# Supplementary material for: Tetrahedrite-(Cd), Cu6(Cu4Cd2)Sb4S13, from Radětice near Příbram, Czech Republic: the new Cd member of the tetrahedrite group
Source: Copernicus journal article supplement (doi:10.5194/ejm-35-897-2023), 2023-11-01
Supplement: Supplementary file 1 [file ejm-35-897-2023-supplement.zip]

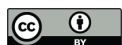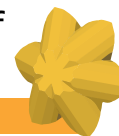

*Supplement of*

**Tetrahedrite-(Cd),  $\text{Cu}_6(\text{Cu}_4\text{Cd}_2)\text{Sb}_4\text{S}_{13}$ , from Radětice near Příbram, Czech Republic: the new Cd member of the tetrahedrite group**

Jiří Sejkora et al.

*Correspondence to:* Jiří Sejkora ([jiri.sejkora@nm.cz](mailto:jiri.sejkora@nm.cz))

- [ejm-35-897-2023-supplement-title-page.pdf](#)
- [tetrahedrite-\(Cd\).cif](#)

The copyright of individual parts of the supplement might differ from the article licence.
