# Supplementary material for: Tetrahedrite-(Cd), Cu6(Cu4Cd2)Sb4S13, from Radětice near Příbram, Czech Republic: the new Cd member of the tetrahedrite group
Source: Copernicus journal article supplement (doi:10.5194/ejm-35-897-2023), 2023-11-01
Supplement: Supplementary file 2 [file ejm-35-897-2023-supplement.zip]

Archive with 2 entries (2 files):
- ejm-35-897-2023-supplement-title-page.pdf
- tetrahedrite-(Cd).cif
