# Supplementary material for: Tetrahedrite-(Cd), Cu6(Cu4Cd2)Sb4S13, from Radětice near Příbram, Czech Republic: the new Cd member of the tetrahedrite group
Source: Copernicus journal article supplement (doi:10.5194/ejm-35-897-2023), 2023-11-01
Supplement: Supplementary file 2 [file ejm-35-897-2023-supplement.zip › tetrahedrite-(Cd).cif]

 
data_shelx
 
_audit_creation_method            'SHELXL-2018/1'
_shelx_SHELXL_version_number      '2018/1'
_chemical_name_mineral            'tetrahedrite-(Cd)'
_chemical_compound_source         'Radetice, Bohemia, Czech Republic'
_chemical_formula_analytical
;      
Ag0.34 Cd1.73 Cu9.65 Fe0.06 Hg0.07 Pb0.03 S12.84 Sb4.06 Zn0.07
; 
_chemical_formula_sum
 'Cd1.615 Cu10.445 S13 Sb4' 
_chemical_formula_weight        1749.095

loop_
 _atom_type_symbol
 _atom_type_description
 _atom_type_scat_dispersion_real
 _atom_type_scat_dispersion_imag
 _atom_type_scat_source
 'Cu'  'Cu'   0.3201   1.2651
 'International Tables Vol C Tables 4.2.6.8 and 6.1.1.4'
 'As'  'As'   0.0499   2.0058
 'International Tables Vol C Tables 4.2.6.8 and 6.1.1.4'
 'Sb'  'Sb'  -0.5866   1.5461
 'International Tables Vol C Tables 4.2.6.8 and 6.1.1.4'
 'S'  'S'   0.1246   0.1234
 'International Tables Vol C Tables 4.2.6.8 and 6.1.1.4'
 'Cd'  'Cd'  -0.8075   1.2024
 'International Tables Vol C Tables 4.2.6.8 and 6.1.1.4'
 'Ag'  'Ag'  -0.8971   1.1015
 'International Tables Vol C Tables 4.2.6.8 and 6.1.1.4'
 
_space_group_crystal_system       cubic
_space_group_IT_number            217
_space_group_name_H-M_alt         'I -4 3 m'
_space_group_name_Hall            'I -4 2 3'
 
_shelx_space_group_comment
;
The symmetry employed for this shelxl refinement is uniquely defined
by the following loop, which should always be used as a source of
symmetry information in preference to the above space-group names.
They are only intended as comments.
;
 
loop_
 _space_group_symop_operation_xyz
 'x, y, z'
 'x, -y, -z'
 '-x, -y, z'
 '-x, y, -z'
 'y, -x, -z'
 '-y, -x, z'
 '-y, x, -z'
 'y, x, z'
 'y, z, x'
 '-y, -z, x'
 'y, -z, -x'
 '-y, z, -x'
 'z, -y, -x'
 'z, y, x'
 '-z, y, -x'
 '-z, -y, x'
 'z, x, y'
 '-z, x, -y'
 '-z, -x, y'
 'z, -x, -y'
 'x, z, y'
 'x, -z, -y'
 '-x, z, -y'
 '-x, -z, y'
 'x+1/2, y+1/2, z+1/2'
 'x+1/2, -y+1/2, -z+1/2'
 '-x+1/2, -y+1/2, z+1/2'
 '-x+1/2, y+1/2, -z+1/2'
 'y+1/2, -x+1/2, -z+1/2'
 '-y+1/2, -x+1/2, z+1/2'
 '-y+1/2, x+1/2, -z+1/2'
 'y+1/2, x+1/2, z+1/2'
 'y+1/2, z+1/2, x+1/2'
 '-y+1/2, -z+1/2, x+1/2'
 'y+1/2, -z+1/2, -x+1/2'
 '-y+1/2, z+1/2, -x+1/2'
 'z+1/2, -y+1/2, -x+1/2'
 'z+1/2, y+1/2, x+1/2'
 '-z+1/2, y+1/2, -x+1/2'
 '-z+1/2, -y+1/2, x+1/2'
 'z+1/2, x+1/2, y+1/2'
 '-z+1/2, x+1/2, -y+1/2'
 '-z+1/2, -x+1/2, y+1/2'
 'z+1/2, -x+1/2, -y+1/2'
 'x+1/2, z+1/2, y+1/2'
 'x+1/2, -z+1/2, -y+1/2'
 '-x+1/2, z+1/2, -y+1/2'
 '-x+1/2, -z+1/2, y+1/2'
 
_cell_length_a                    10.504(3)
_cell_length_b                    10.504(3)
_cell_length_c                    10.504(3)
_cell_angle_alpha                 90
_cell_angle_beta                  90
_cell_angle_gamma                 90
_cell_volume                      1158.9(9)
_cell_formula_units_Z             2
_cell_measurement_temperature     293(2)
_cell_measurement_reflns_used     1040
_cell_measurement_theta_min       3.88
_cell_measurement_theta_max       27.48
 
_exptl_crystal_description        'anhedral'
_exptl_crystal_colour             'black'
_exptl_crystal_density_meas       'not measured'
_exptl_crystal_density_method     ?
_exptl_crystal_density_diffrn     5.012          
_exptl_crystal_F_000              1584.8
_exptl_transmission_factor_min    ?
_exptl_transmission_factor_max    ?
_exptl_crystal_size_max           0.100
_exptl_crystal_size_mid           0.040
_exptl_crystal_size_min           0.035
_exptl_absorpt_coefficient_mu     16.543
_shelx_estimated_absorpt_T_min    ?
_shelx_estimated_absorpt_T_max    ?
_exptl_absorpt_correction_type    multi-scan
_exptl_absorpt_correction_T_min   0.457
_exptl_absorpt_correction_T_max   0.560
_exptl_absorpt_process_details
;
 SADABS 2016/2: Krause, L., Herbst-Irmer, R., Sheldrick G.M. & Stalke D.,
 J. Appl. Cryst. 48 (2015) 3-10
;
_exptl_absorpt_special_details    ?
_diffrn_ambient_temperature       293(2)
_diffrn_radiation_wavelength      0.71073
_diffrn_radiation_type            MoK\a
_diffrn_source                    'micro-focus'
_diffrn_measurement_device_type   'Bruker D8 Venture'
_diffrn_reflns_number             1594
_diffrn_reflns_av_unetI/netI      0.0344
_diffrn_reflns_av_R_equivalents   0.0456
_diffrn_reflns_limit_h_min        -13
_diffrn_reflns_limit_h_max        6
_diffrn_reflns_limit_k_min        -12
_diffrn_reflns_limit_k_max        12
_diffrn_reflns_limit_l_min        -11
_diffrn_reflns_limit_l_max        13
_diffrn_reflns_theta_min          2.742
_diffrn_reflns_theta_max          27.477
_diffrn_reflns_theta_full         25.242
_diffrn_measured_fraction_theta_max   1.000
_diffrn_measured_fraction_theta_full  1.000
_diffrn_reflns_Laue_measured_fraction_max    1.000
_diffrn_reflns_Laue_measured_fraction_full   1.000
_diffrn_reflns_point_group_measured_fraction_max   1.000
_diffrn_reflns_point_group_measured_fraction_full  1.000
_reflns_number_total              272
_reflns_number_gt                 257
_reflns_threshold_expression      'I > 2\s(I)'
_reflns_Friedel_coverage          0.728
_reflns_Friedel_fraction_max      1.000
_reflns_Friedel_fraction_full     1.000
 
_reflns_special_details
;
 Reflections were merged by SHELXL according to the crystal
 class for the calculation of statistics and refinement.
 
 _reflns_Friedel_fraction is defined as the number of unique
 Friedel pairs measured divided by the number that would be
 possible theoretically, ignoring centric projections and
 systematic absences.
;
 
_computing_data_collection      'Apex4 (Bruker AXS Inc., 2022)'
_computing_cell_refinement      'Apex4 (Bruker AXS Inc., 2022)'
_computing_data_reduction       'Apex4 (Bruker AXS Inc., 2022)'
_computing_structure_solution     'SHELXT 2018/2 (Sheldrick, 2018)'
_computing_structure_refinement 'SHELXL-2018/1 (Sheldrick, 2018)'
_computing_molecular_graphics     ?
_computing_publication_material   ?
_refine_special_details
;
 Refined as a 2-component inversion twin.
;
_refine_ls_structure_factor_coef  Fsqd
_refine_ls_matrix_type            full
_refine_ls_weighting_scheme       calc
_refine_ls_weighting_details
'w=1/[\s^2^(Fo^2^)+(0.0177P)^2^+9.6207P] where P=(Fo^2^+2Fc^2^)/3'
_atom_sites_solution_primary      ?
_atom_sites_solution_secondary    ?
_atom_sites_solution_hydrogens    .
_refine_ls_hydrogen_treatment     undef
_refine_ls_extinction_method      none
_refine_ls_extinction_coef        .
_refine_ls_abs_structure_details
;
 Refined as an inversion twin.
;
_refine_ls_abs_structure_Flack    0.05(11)
_chemical_absolute_configuration  ?
_refine_ls_number_reflns          272
_refine_ls_number_parameters      23
_refine_ls_number_restraints      0
_refine_ls_R_factor_all           0.0283
_refine_ls_R_factor_gt            0.0252
_refine_ls_wR_factor_ref          0.0645
_refine_ls_wR_factor_gt           0.0622
_refine_ls_goodness_of_fit_ref    1.158
_refine_ls_restrained_S_all       1.158
_refine_ls_shift/su_max           0.000
_refine_ls_shift/su_mean          0.000
 
loop_
 _atom_site_label
 _atom_site_type_symbol
 _atom_site_fract_x
 _atom_site_fract_y
 _atom_site_fract_z
 _atom_site_U_iso_or_equiv
 _atom_site_adp_type
 _atom_site_occupancy
 _atom_site_site_symmetry_order  
 _atom_site_calc_flag
 _atom_site_refinement_flags_posn
 _atom_site_refinement_flags_adp
 _atom_site_refinement_flags_occupancy
 _atom_site_disorder_assembly
 _atom_site_disorder_group
M2A Cu 0.2131(10) 0.000000 0.000000 0.036(10) Uani 0.63(7) 4 d S T P . .
M2B Cu 0.217(2) -0.029(4) 0.029(4) 0.036(10) Uani 0.19(4) 2 d S T P . .
M1CU Cu 0.250000 0.500000 0.000000 0.0241(8) Uani 0.731(17) 4 d S T P . .
M1CD Cd 0.250000 0.500000 0.000000 0.0241(8) Uani 0.269(17) 4 d S T P . .
X3SB Sb 0.26536(7) 0.26536(7) 0.26536(7) 0.0199(4) Uani 1 6 d S T P . .
S1 S 0.1149(2) 0.1149(2) 0.3573(3) 0.0224(7) Uani 1 2 d S T P . .
S2 S 0.000000 0.000000 0.000000 0.024(2) Uani 1 24 d S T P . .
 
loop_
 _atom_site_aniso_label
 _atom_site_aniso_U_11
 _atom_site_aniso_U_22
 _atom_site_aniso_U_33
 _atom_site_aniso_U_23
 _atom_site_aniso_U_13
 _atom_site_aniso_U_12
M2A 0.0218(19) 0.043(16) 0.043(16) -0.018(16) 0.000 0.000
M2B 0.0218(19) 0.043(16) 0.043(16) -0.018(16) 0.000 0.000
M1CU 0.0305(16) 0.0209(7) 0.0209(7) 0.000 0.000 0.000
M1CD 0.0305(16) 0.0209(7) 0.0209(7) 0.000 0.000 0.000
X3SB 0.0199(4) 0.0199(4) 0.0199(4) -0.0035(3) -0.0035(3) -0.0035(3)
S1 0.0235(10) 0.0235(10) 0.0202(16) 0.0010(8) 0.0010(8) -0.0062(13)
S2 0.024(2) 0.024(2) 0.024(2) 0.000 0.000 0.000
 
_geom_special_details
;
 All esds (except the esd in the dihedral angle between two l.s. planes)
 are estimated using the full covariance matrix.  The cell esds are taken
 into account individually in the estimation of esds in distances, angles
 and torsion angles; correlations between esds in cell parameters are only
 used when they are defined by crystal symmetry.  An approximate (isotropic)
 treatment of cell esds is used for estimating esds involving l.s. planes.
;
 
loop_
 _geom_bond_atom_site_label_1
 _geom_bond_atom_site_label_2
 _geom_bond_distance
 _geom_bond_site_symmetry_2
 _geom_bond_publ_flag
M2A M2B 0.43(6) 2 ?
M2A S2 2.238(11) . ?
M2A S1 2.282(8) 14 ?
M2A S1 2.282(8) 13 ?
M2A M2B 3.01(3) 6 ?
M2A M2B 3.01(3) 12 ?
M2A M2B 3.01(3) 7 ?
M2A M2B 3.01(3) 10 ?
M2B M2B 0.85(13) 2 ?
M2B S1 2.29(3) 14 ?
M2B S1 2.29(3) 13 ?
M2B S2 2.322(19) . ?
M2B M2B 2.80(9) 6 ?
M2B M2B 2.80(9) 10 ?
M2B X3SB 3.07(6) 28_545 ?
M1CU S1 2.391(2) 28 ?
M1CU S1 2.391(2) 9 ?
M1CU S1 2.391(2) 27_554 ?
M1CU S1 2.391(2) 11_565 ?
X3SB S1 2.435(3) 14 ?
X3SB S1 2.435(3) 9 ?
X3SB S1 2.435(3) . ?
 
loop_
 _geom_angle_atom_site_label_1
 _geom_angle_atom_site_label_2
 _geom_angle_atom_site_label_3
 _geom_angle
 _geom_angle_site_symmetry_1
 _geom_angle_site_symmetry_3
 _geom_angle_publ_flag
M2B M2A S2 96(5) 2 . ?
M2B M2A S1 86(3) 2 14 ?
S2 M2A S1 131.6(2) . 14 ?
M2B M2A S1 86(3) 2 13 ?
S2 M2A S1 131.6(2) . 13 ?
S1 M2A S1 96.8(4) 14 13 ?
M2B M2A M2B 132(3) 2 6 ?
S2 M2A M2B 49.9(6) . 6 ?
S1 M2A M2B 140.9(11) 14 6 ?
S1 M2A M2B 94.5(2) 13 6 ?
M2B M2A M2B 58(5) 2 12 ?
S2 M2A M2B 49.9(6) . 12 ?
S1 M2A M2B 140.9(11) 14 12 ?
S1 M2A M2B 94.5(2) 13 12 ?
M2B M2A M2B 75(2) 6 12 ?
M2B M2A M2B 58(5) 2 7 ?
S2 M2A M2B 49.9(6) . 7 ?
S1 M2A M2B 94.5(2) 14 7 ?
S1 M2A M2B 140.9(11) 13 7 ?
M2B M2A M2B 99.8(11) 6 7 ?
M2B M2A M2B 55.5(13) 12 7 ?
M2B M2A M2B 132(3) 2 10 ?
S2 M2A M2B 49.9(6) . 10 ?
S1 M2A M2B 94.5(2) 14 10 ?
S1 M2A M2B 140.9(11) 13 10 ?
M2B M2A M2B 55.5(13) 6 10 ?
M2B M2A M2B 99.8(11) 12 10 ?
M2B M2A M2B 75(2) 7 10 ?
M2B M2B S1 79.3(16) 2 14 ?
M2B M2B S1 79.3(16) 2 13 ?
S1 M2B S1 96.3(14) 14 13 ?
M2B M2B S2 79.5(17) 2 . ?
S1 M2B S2 126.6(10) 14 . ?
S1 M2B S2 126.6(10) 13 . ?
M2B M2B M2B 119.996(5) 2 6 ?
S1 M2B M2B 156.7(15) 14 6 ?
S1 M2B M2B 100.0(11) 13 6 ?
S2 M2B M2B 52.9(13) . 6 ?
M2B M2B M2B 119.998(8) 2 10 ?
S1 M2B M2B 100.0(11) 14 10 ?
S1 M2B M2B 156.7(15) 13 10 ?
S2 M2B M2B 52.9(13) . 10 ?
M2B M2B M2B 60.000(2) 6 10 ?
M2B M2B M2A 112.6(10) 2 5 ?
S1 M2B M2A 162(2) 14 5 ?
S1 M2B M2A 99.6(5) 13 5 ?
S2 M2B M2A 47.5(8) . 5 ?
M2B M2B M2A 7.4(10) 6 5 ?
M2B M2B M2A 62.2(6) 10 5 ?
M2B M2B M2A 112.6(10) 2 9 ?
S1 M2B M2A 99.6(5) 14 9 ?
S1 M2B M2A 162(2) 13 9 ?
S2 M2B M2A 47.5(8) . 9 ?
M2B M2B M2A 62.2(6) 6 9 ?
M2B M2B M2A 7.4(10) 10 9 ?
M2A M2B M2A 63.4(11) 5 9 ?
M2B M2B X3SB 176.6(6) 2 28_545 ?
S1 M2B X3SB 98.4(14) 14 28_545 ?
S1 M2B X3SB 98.4(14) 13 28_545 ?
S2 M2B X3SB 104(2) . 28_545 ?
M2B M2B X3SB 62.8(4) 6 28_545 ?
M2B M2B X3SB 62.8(4) 10 28_545 ?
M2A M2B X3SB 70.2(13) 5 28_545 ?
M2A M2B X3SB 70.2(13) 9 28_545 ?
S1 M1CU S1 110.62(8) 28 9 ?
S1 M1CU S1 107.19(15) 28 27_554 ?
S1 M1CU S1 110.62(8) 9 27_554 ?
S1 M1CU S1 110.62(8) 28 11_565 ?
S1 M1CU S1 107.19(15) 9 11_565 ?
S1 M1CU S1 110.62(8) 27_554 11_565 ?
S1 X3SB S1 95.37(11) 14 9 ?
S1 X3SB S1 95.37(11) 14 . ?
S1 X3SB S1 95.37(11) 9 . ?
S1 X3SB M2B 102.5(3) 14 29 ?
S1 X3SB M2B 153.2(5) 9 29 ?
S1 X3SB M2B 102.5(3) . 29 ?
S1 X3SB M2B 102.5(3) 14 35 ?
S1 X3SB M2B 102.5(3) 9 35 ?
S1 X3SB M2B 153.2(5) . 35 ?
M2B X3SB M2B 54.4(8) 29 35 ?
S1 X3SB M2B 153.2(5) 14 28 ?
S1 X3SB M2B 102.5(3) 9 28 ?
S1 X3SB M2B 102.5(3) . 28 ?
M2B X3SB M2B 54.4(8) 29 28 ?
M2B X3SB M2B 54.4(8) 35 28 ?
M2A S1 M2B 10.7(15) 9 10 ?
M2A S1 M2B 10.7(15) 9 9 ?
M2B S1 M2B 21(3) 10 9 ?
M2A S1 M1CU 117.58(14) 9 29_455 ?
M2B S1 M1CU 126.3(15) 10 29_455 ?
M2B S1 M1CU 107.8(13) 9 29_455 ?
M2A S1 M1CU 117.58(14) 9 27 ?
M2B S1 M1CU 107.8(13) 10 27 ?
M2B S1 M1CU 126.3(15) 9 27 ?
M1CU S1 M1CU 101.90(12) 29_455 27 ?
M2A S1 X3SB 115.0(2) 9 . ?
M2B S1 X3SB 115.4(6) 10 . ?
M2B S1 X3SB 115.4(6) 9 . ?
M1CU S1 X3SB 101.02(10) 29_455 . ?
M1CU S1 X3SB 101.02(10) 27 . ?
M2A S2 M2A 180.0 11 9 ?
M2A S2 M2A 90.0 11 7 ?
M2A S2 M2A 90.0 9 7 ?
M2A S2 M2A 90.0 11 3 ?
M2A S2 M2A 90.0 9 3 ?
M2A S2 M2A 90.0 7 3 ?
M2A S2 M2A 90.0 11 5 ?
M2A S2 M2A 90.0 9 5 ?
M2A S2 M2A 180.0 7 5 ?
M2A S2 M2A 90.0 3 5 ?
M2A S2 M2A 90.0 11 . ?
M2A S2 M2A 90.0 9 . ?
M2A S2 M2A 90.0 7 . ?
M2A S2 M2A 180.0 3 . ?
M2A S2 M2A 90.0 5 . ?
M2A S2 M2B 10.5(17) 11 11 ?
M2A S2 M2B 169.5(17) 9 11 ?
M2A S2 M2B 97.4(12) 7 11 ?
M2A S2 M2B 82.6(12) 3 11 ?
M2A S2 M2B 82.6(12) 5 11 ?
M2A S2 M2B 97.4(12) . 11 ?
M2A S2 M2B 82.6(12) 11 5 ?
M2A S2 M2B 97.4(12) 9 5 ?
M2A S2 M2B 169.5(17) 7 5 ?
M2A S2 M2B 82.6(12) 3 5 ?
M2A S2 M2B 10.5(17) 5 5 ?
M2A S2 M2B 97.4(12) . 5 ?
M2B S2 M2B 74(3) 11 5 ?
M2A S2 M2B 82.6(12) 11 4 ?
M2A S2 M2B 97.4(12) 9 4 ?
M2A S2 M2B 97.4(12) 7 4 ?
M2A S2 M2B 10.5(17) 3 4 ?
M2A S2 M2B 82.6(12) 5 4 ?
M2A S2 M2B 169.5(17) . 4 ?
M2B S2 M2B 74(3) 11 4 ?
M2B S2 M2B 74(3) 5 4 ?
M2A S2 M2B 169.5(17) 11 10 ?
M2A S2 M2B 10.5(17) 9 10 ?
M2A S2 M2B 97.4(12) 7 10 ?
M2A S2 M2B 97.4(12) 3 10 ?
M2A S2 M2B 82.6(12) 5 10 ?
M2A S2 M2B 82.6(12) . 10 ?
M2B S2 M2B 165(2) 11 10 ?
M2B S2 M2B 91.0(3) 5 10 ?
M2B S2 M2B 104(2) 4 10 ?
M2A S2 M2B 169.5(17) 11 9 ?
M2A S2 M2B 10.5(17) 9 9 ?
M2A S2 M2B 82.6(12) 7 9 ?
M2A S2 M2B 82.6(12) 3 9 ?
M2A S2 M2B 97.4(12) 5 9 ?
M2A S2 M2B 97.4(12) . 9 ?
M2B S2 M2B 165(2) 11 9 ?
M2B S2 M2B 104(2) 5 9 ?
M2B S2 M2B 91.0(3) 4 9 ?
M2B S2 M2B 21(3) 10 9 ?
M2A S2 M2B 82.6(12) 11 2 ?
M2A S2 M2B 97.4(12) 9 2 ?
M2A S2 M2B 82.6(12) 7 2 ?
M2A S2 M2B 169.5(17) 3 2 ?
M2A S2 M2B 97.4(12) 5 2 ?
M2A S2 M2B 10.5(17) . 2 ?
M2B S2 M2B 91.0(3) 11 2 ?
M2B S2 M2B 104(2) 5 2 ?
M2B S2 M2B 165(2) 4 2 ?
M2B S2 M2B 91.0(3) 10 2 ?
M2B S2 M2B 104(2) 9 2 ?
 
_refine_diff_density_max    0.665
_refine_diff_density_min   -0.513
_refine_diff_density_rms    0.154

_shelx_res_file
;

TITL   tetrahedrite-(Cd)
    shelx.res
    created by SHELXL-2018/1 at 20:51:37 on 08-Oct-2022
REM  CHEM Ag1.11 Cu9.59 Mn0.26 Fe0.04 Zn0.10 Cd1.04 Sb3.25 As0.61 S12.95
CELL  0.71073  10.5040  10.5040  10.5040   90.000   90.000   90.000
ZERR    8.000   0.0028   0.0028   0.0028    0.000    0.000    0.000
LATT   -2
SYMM   +X,-Y,-Z
SYMM   -X,-Y,+Z
SYMM   -X,+Y,-Z
SYMM   +Y,-X,-Z
SYMM   -Y,-X,+Z
SYMM   -Y,+X,-Z
SYMM   +Y,+X,+Z
SYMM   +Y,+Z,+X
SYMM   -Y,-Z,+X
SYMM   +Y,-Z,-X
SYMM   -Y,+Z,-X
SYMM   +Z,-Y,-X
SYMM   +Z,+Y,+X
SYMM   -Z,+Y,-X
SYMM   -Z,-Y,+X
SYMM   +Z,+X,+Y
SYMM   -Z,+X,-Y
SYMM   -Z,-X,+Y
SYMM   +Z,-X,-Y
SYMM   +X,+Z,+Y
SYMM   +X,-Z,-Y
SYMM   -X,+Z,-Y
SYMM   -X,-Z,+Y
SFAC  Cu   As   Sb   S   Cd  Ag
UNIT  1    1    1    1    1   1
L.S. 10
ACTA
BOND
TWIN
FMAP 2
PLAN 20
EADP M2A M2B
EXYZ M1CU M1CD
EADP M1CU M1CD
WGHT    0.017700    9.620708
BASF   0.05167
FVAR       0.10471   0.63333   0.73145   0.19420
M2A   1    0.213078    0.000000    0.000000    20.25000    0.02178    0.04308 =
         0.04308   -0.01768    0.00000    0.00000
M2B   1    0.217346   -0.028554    0.028554    40.50000    0.02178    0.04308 =
         0.04308   -0.01768    0.00000    0.00000
M1CU  1    0.250000    0.500000    0.000000    30.25000    0.03055    0.02087 =
         0.02087    0.00000    0.00000    0.00000
M1CD  5    0.250000    0.500000    0.000000   -30.25000    0.03055    0.02087 =
         0.02087    0.00000    0.00000    0.00000
X3SB  3    0.265356    0.265356    0.265356    10.16667    0.01986    0.01986 =
         0.01986   -0.00348   -0.00348   -0.00348
S1    4    0.114903    0.114903    0.357305    10.50000    0.02351    0.02351 =
         0.02023    0.00098    0.00098   -0.00621
S2    4    0.000000    0.000000    0.000000    10.04167    0.02378    0.02378 =
         0.02378    0.00000    0.00000    0.00000
HKLF  4


REM    tetrahedrite-(Cd)
REM R1 =  0.0252 for     257 Fo > 4sig(Fo)  and  0.0283 for all     272 data
REM     23 parameters refined using      0 restraints

END

WGHT      0.0150     11.4456

REM Highest difference peak  0.665,  deepest hole -0.513,  1-sigma level  0.154
Q1    1   0.0000  0.1040  0.0000  10.25000  0.05    0.67
Q2    1   0.1094  0.1094  0.2487  10.50000  0.05    0.56
Q3    1   0.1381  0.1381  0.5180  10.50000  0.05    0.51
Q4    1   0.3061  0.3061  0.3061  10.16667  0.05    0.51
Q5    1   0.3881  0.2651  0.2651  10.50000  0.05    0.46
Q6    1   0.1096  0.1096  0.4310  10.50000  0.05    0.46
Q7    1   0.0966  0.5000  0.0000  10.50000  0.05    0.45
Q8    1   0.2688 -0.0961  0.1202  11.00000  0.05    0.44
Q9    1   0.1687 -0.1687 -0.0038  10.50000  0.05    0.44
Q10   1   0.4407  0.5000  0.0000  10.50000  0.05    0.43
Q11   1   0.3820 -0.0462  0.0462  10.50000  0.05    0.42
Q12   1  -0.0151  0.0151  0.3929  10.50000  0.05    0.41
Q13   1   0.2102  0.2102  0.4082  10.50000  0.05    0.41
Q14   1   0.0043  0.0561  0.3799  11.00000  0.05    0.39
Q15   1   0.1240  0.0764  0.1240  10.50000  0.05    0.38
Q16   1   0.1040  0.1596  0.4800  11.00000  0.05    0.38
Q17   1   0.1085  0.2134  0.2134  10.50000  0.05    0.36
Q18   1   0.2585  0.0843  0.2585  10.50000  0.05    0.36
Q19   1   0.1499  0.2947  0.2947  10.50000  0.05    0.35
Q20   1   0.1176  0.1886  0.3537  11.00000  0.05    0.35
;
_shelx_res_checksum   36278

_shelx_hkl_file
;
  -1   0  -1    5.10    0.50
  -1   1   0    5.30    0.60
   0  -1  -1    4.00    0.50
   0   1   1    5.10    0.60
   1  -1   0    5.90    0.60
   0  -2   0   87.59    5.00
   0   0   2   85.09    5.10
   0   2   0   85.89    5.00
  -2  -1  -1   56.89    3.50
  -1  -2  -1   57.09    3.60
  -1  -1  -2   58.19    3.60
  -1   1   2   57.19    3.70
  -1   2   1   62.39    3.60
   1  -2  -1   57.19    3.60
   1  -1   2   60.19    3.40
   1   1   2   54.39    3.60
   1   2   1   54.79    3.60
  -2   0  -2  269.97   15.20
  -2   2   0  290.47   15.20
   0  -2  -2  267.27   15.40
   0   2   2  251.37   15.40
   2   0   2  276.77   15.20
  -2  -2  -2 8776.52  517.75
  -2  -2  -2 8485.85  610.04
  -2  -2   2 8638.74  517.35
  -2  -2   2 9822.92  653.73
  -2   2   2 9148.28  522.75
  -2   2   2 8427.66  634.44
   2  -2  -2 8714.03  521.05
   2  -2  -2 9790.42  665.53
   2   2  -2 9098.89  516.95
   2   2  -2 9012.40  640.04
   2   2   2 8261.27  517.45
   2   2   2 9999.00  638.14
  -1   3   0    4.00    0.70
   0  -1  -3    3.90    1.00
   0   1   3    4.10    0.90
   1  -3   0    3.40    0.80
  -3  -1  -2  106.19    6.40
   2   1   3  107.29    6.50
  -2   3   1  107.69    6.40
  -1  -2  -3  112.19    6.50
  -1   2   3   97.89    6.60
   1   3   2  104.79    6.50
   1  -3  -2  115.29    6.50
   2  -3  -1  114.79    6.40
  -2  -1  -3  104.59    6.40
  -3  -2  -1   96.09    6.50
  -1  -3  -2  117.09    6.80
  -1   3   2  103.99    6.50
   1   2   3  114.69    6.60
   2  -1   3  101.89    6.20
   1  -2  -3  105.79    6.70
  -3   0  -3  234.98   13.30
   0  -3  -3  237.88   13.60
   0   3   3  229.98   13.60
   3   0   3  233.88   13.30
  -3  -3  -2   79.59    5.40
  -3  -2  -3   91.29    5.40
  -3   2   3   77.89    5.50
  -3   3   2   89.49    5.50
  -2  -3  -3   72.99    5.80
  -2   3   3   84.09    5.50
   2  -3  -3   84.59    5.50
   2   3   3   83.99    5.40
   3   2   3   79.59    5.30
  -4   0   0 3813.92  238.38
  -4   0   0 3891.31  340.07
   0  -4   0 4376.86  348.37
   0   0  -4 3806.32  252.37
   0   0  -4 3533.95  367.16
   0   0   4 4061.19  247.88
   0   0   4 4312.27  396.66
   0   4   0 3902.61  243.58
   0   4   0 3799.32  330.57
   4   0   0 3965.60  238.38
   4   0   0 4263.37  338.67
   1   4   1  223.18   13.60
   1   1   4  231.08   13.50
   1  -4   1  235.78   13.40
   1  -4  -1  255.67   13.60
  -1  -4  -1  242.98   13.60
  -1  -1  -4  233.08   13.70
  -1   1   4  227.08   13.70
   0   2   4   88.59    5.80
   2  -4   0   96.09    5.50
   0  -2  -4   89.39    6.20
  -4   0  -2   91.39    5.40
  -2  -4   0   84.79    5.90
  -2   4   0   90.69    5.60
   0   4   2   88.39    6.00
   0  -4  -2   93.59    5.80
  -2   0  -4   90.69    5.70
  -2   2   4  108.49    7.20
  -2  -2  -4  107.99    6.90
   2   2   4  109.59    7.00
  -2   4   2  114.19    7.00
   2  -4  -2  118.79    7.00
  -4  -1  -3  192.88   11.20
   1  -4  -3  187.88   11.50
   1   4   3  195.78   11.60
  -3  -4  -1  221.88   11.60
  -3   4   1  213.78   11.40
  -1   3   4  196.18   12.00
  -3   1  -4  187.68   11.20
  -4  -3  -1  191.98   11.50
  -4   3   1  188.28   11.40
  -3  -1  -4  180.38   11.20
  -1  -4  -3  194.38   11.50
  -1   4   3  188.98   11.50
   3  -1   4  178.68   11.00
  -4   3   3  235.38   15.10
  -3  -3  -4  282.87   15.10
  -3   3   4  241.28   15.20
  -3   4   3  246.58   15.20
   3   3   4  280.07   15.10
  -4  -4   0 7003.90  448.16
  -4  -4   0 7536.65  618.04
  -4   0  -4 7488.75  432.26
  -4   0  -4 6782.02  514.25
  -4   0   4 7382.06  453.05
  -4   4   0 7786.52  431.56
  -4   4   0 7195.08  529.15
   0  -4  -4 6638.94  449.36
   0  -4  -4 7219.58  617.24
   0  -4   4 7341.87  434.06
   0   4  -4 6896.01  566.34
   0   4   4 6876.51  476.35
   0   4   4 7075.89  637.64
   4  -4   0 7663.33  428.76
   4  -4   0 7647.73  524.95
   4   0  -4 7269.37  669.03
   4   0   4 7493.95  429.86
   4   0   4 7872.41  539.95
   4   4   0 7331.67  446.56
   4   4   0 7095.29  595.84
  -4  -4  -2   79.59    5.80
  -4  -2  -4   97.39    5.80
  -4   4   2   82.19    5.80
  -2  -4  -4   76.59    5.80
  -2   4   4   84.99    5.90
   2  -4  -4   80.19    6.00
   2   4   4   78.99    5.80
   4   2   4   94.29    5.70
  -4  -4  -4 1368.06   76.19
  -4   4   4 1375.86   76.39
   4   4   4 1351.36   76.19
  -1  -5   0   88.09    6.10
  -1   5   0   92.69    6.10
   0   1   5   95.39    6.20
   1  -5   0  107.89    6.10
   0   5   1   94.79    6.20
   1   0   5   94.49    6.10
   0  -5  -1   95.99    6.10
   0  -5   1  103.39    6.10
  -1  -2  -5  336.87   19.30
  -2   5   1  322.97   19.10
  -2  -5  -1  322.57   19.20
   2  -5   1  331.37   18.80
   2   1   5  340.67   19.10
  -5  -1  -2  339.27   19.00
  -1   2   5  331.97   19.30
   1   5   2  321.07   19.20
   1  -5  -2  338.17   19.10
  -1  -5  -2  325.97   19.20
  -2  -1  -5  344.07   19.20
   1   2   5  342.07   19.20
   2  -5  -1  347.97   19.10
  -2   1   5  343.27   19.40
   2  -1   5  319.67   18.90
  -1   5   2  329.67   19.20
   1  -5   2  334.27   18.90
  -3   0  -5   24.00    2.50
   3   0   5   25.60    2.70
   0  -3  -5   27.80    3.00
   0   3   5   23.30    2.80
   2  -5  -3   87.59    5.80
   2   5   3   73.49    6.00
  -2   3   5   88.19    6.00
  -5  -2  -3   82.59    5.60
  -3  -5  -2   99.59    6.20
   2  -3   5   83.69    5.20
  -2  -5  -3   77.99    5.90
  -5  -3  -2   81.19    5.70
  -2   5   3   86.49    6.00
  -3   2   5   77.79    5.90
  -5   3   2   78.89    5.80
  -1   4   5   30.50    3.50
   1  -5  -4   30.90    3.40
  -5  -1  -4   33.10    3.10
  -1  -4  -5   30.30    3.50
  -4  -5  -1   36.50    3.70
  -4   5   1   29.90    3.20
   1   5   4   33.40    3.70
  -1  -5  -4   30.00    3.30
   1  -4  -5   32.60    3.70
  -1   5   4   31.60    3.50
  -4  -1  -5   33.30    3.10
  -5   4   1   30.40    3.20
   3   5   4   63.59    5.50
  -3   4   5   73.69    5.70
  -5   3   4   70.39    5.70
  -4  -5  -3   71.59    5.70
  -3  -4  -5   77.89    5.50
   4   3   5   74.39    5.50
  -5  -4  -3   69.19    5.40
  -4  -3  -5   69.89    5.40
  -5   4   3   74.89    5.60
  -3  -5  -4   72.59    5.60
   3   4   5   72.39    5.50
  -5   0  -5  238.58   12.60
  -5   5   0  204.48   12.50
   0  -5  -5  197.08   13.00
   0   5   5  213.78   13.10
  -5  -5  -2   69.59    5.30
  -5  -2  -5   62.49    4.80
  -5   5   2   60.29    5.10
  -2  -5  -5   63.39    5.10
   2   5   5   54.59    5.00
  -5  -5  -4  102.89    7.70
  -5  -4  -5  104.29    7.70
  -5   4   5  112.49    7.80
  -5   5   4  122.29    8.00
  -4  -5  -5   96.79    7.50
  -4   5   5  115.59    7.90
   4   5   5   91.19   10.30
   0   0   6    8.90    1.60
   1   1   6  612.84   34.70
   1  -6   1  619.34   34.50
  -1   1   6  600.74   34.80
  -1   6   1  632.34   34.70
   1  -6  -1  621.74   34.60
  -1  -6   1  611.54   34.60
  -1  -6  -1  597.64   34.70
  -2   6   0  205.28   11.90
  -2  -6   0  193.08   12.10
   0   6   2  205.68   12.20
   0  -6   2  201.58   11.90
   0   2   6  192.98   12.20
   2  -6   0  202.88   11.80
   0  -6  -2  210.38   12.10
   2  -6   2 2849.51  160.08
   2  -2   6 2826.32  160.18
  -2  -2  -6 2924.11  160.58
  -2   6   2 2795.32  160.48
   2  -6  -2 3075.09  160.48
  -1  -3  -6   78.59    5.90
   1  -6  -3   78.19    5.70
  -1   3   6   80.09    5.90
   3   1   6   78.29    5.70
  -3  -6  -1   79.49    5.80
   1   6   3   78.59    5.90
  -3   6   1   78.19    5.60
   3  -6   1   78.59    5.00
  -6  -1  -3   84.59    5.40
   3  -6  -1   82.29    5.40
  -1  -6  -3   78.19    5.70
   1   3   6   78.09    5.80
  -3   1   6   76.89    5.80
  -3  -1  -6   76.39    5.70
  -1   6   3   79.79    6.00
   1  -6   3   86.49    5.30
  -3  -3  -6  114.99   10.80
  -6  -3  -3  130.29    8.50
  -3   3   6  139.39    8.80
  -3   6   3  140.39    8.90
   3  -6  -3  128.59    8.60
   3   3   6  128.19    8.60
  -6   3   3  136.89    8.80
  -3  -6  -3  130.69    8.80
   0   6   4    6.30    2.20
  -4   0  -6    4.80    1.60
   0  -6  -4    4.40    1.70
  -4  -6   0    5.00    2.00
   0   4   6    6.40    2.00
   4   0   6    3.70    1.30
  -6   4   0    4.20    1.60
   0  -4  -6    5.30    2.00
  -2   4   6   68.59    5.40
  -4  -6  -2   68.39    5.40
  -2  -4  -6   69.99    5.30
  -4   6   2   67.59    5.30
   2  -6  -4   59.19    5.20
   4   2   6   63.39    4.90
   2   6   4   62.69    5.40
  -6  -2  -4   58.99    5.00
  -4   2   6   55.19    5.20
   2   4   6   61.99    5.40
  -2  -6  -4   61.19    5.10
  -6  -4  -2   55.79    5.20
  -6   4   2   67.19    5.30
  -4  -2  -6   61.69    5.10
  -2   6   4   55.09    5.50
  -4  -4  -6   10.20    2.40
   4   4   6   10.20    2.50
  -4   6   4   16.70    2.90
  -6   4   4   13.10    2.80
  -4  -6  -4    9.60    2.60
  -6  -4  -4   15.00    3.20
   1  -6  -5  168.48    9.80
   5   1   6  128.89    8.90
  -5   6   1  151.38    9.30
  -1  -5  -6  136.79    9.50
  -1   5   6  139.09    9.70
   1   6   5  136.09    9.70
  -6  -1  -5  159.58    9.10
  -5  -6  -1  138.09    9.60
  -5   1  -6  152.58    9.20
  -6   5   1  135.09    9.40
  -5  -1  -6  143.99    9.20
   1  -5  -6  146.89    9.90
  -1  -6  -5  147.69    9.60
  -6  -5  -1  148.19    9.70
   1   5   6  142.29    9.60
  -3  -5  -6  298.67   18.40
  -3   5   6  316.87   18.60
  -5   6   3  299.87   18.40
  -5  -6  -3  299.07   18.40
   3  -6  -5  316.67   18.70
  -6  -3  -5  316.27   18.10
  -6   3   5  308.77   18.50
   5   3   6  290.27   18.10
   3   6   5  321.17   18.60
  -6   5   3  295.37   18.50
  -6  -5  -3  315.47   18.30
  -5  -3  -6  308.27   18.10
   3   5   6  315.47   18.50
  -5   3   6  304.67   18.50
  -3  -6  -5  298.47   18.30
  -3   6   5  313.07   18.60
  -6  -5  -5  299.17   17.80
  -6   5   5  296.27   18.10
  -5  -6  -5  277.07   17.80
  -5  -5  -6  292.27   17.80
  -5   5   6  301.07   18.20
  -5   6   5  300.87   18.10
   5   5   6  293.67   17.90
  -6  -6   0   98.29    7.10
  -6   0  -6   86.99    6.20
  -6   6   0   82.19    6.20
   0  -6  -6   83.99    6.80
   0   6   6   91.49    7.10
  -6  -6  -2 1345.17   77.09
  -6  -2  -6 1454.15   76.79
  -6   6   2 1511.35   77.19
  -2  -6  -6 1361.36   77.09
  -2   6   6 1369.66   77.19
   2  -6  -6 1319.87   77.19
   2   6   6 1250.07   76.99
  -6  -6  -4   85.09    6.90
  -6   4   6   82.69    6.90
  -6   6   4   75.39    7.40
  -4  -6  -6   72.49    6.50
  -4   6   6   75.59    6.80
   4   6   6   69.79    6.70
  -6  -6  -6  429.06   26.50
  -6   6   6  472.85   27.00
  -1  -7   0  168.98   10.90
   0  -1   7  165.58   10.70
   0   1   7  169.28   10.90
   1  -7   0  182.88   10.70
   0  -7   1  163.98   10.70
   0   7   1  185.58   11.00
   1   0   7  196.08   10.90
   0  -7  -1  182.48   10.90
  -1   0   7  176.88   10.90
  -1  -2  -7    3.70    2.10
  -1   2   7    3.70    1.80
  -1  -7   2    3.90    1.70
   1  -7  -2    2.50    1.50
   2  -7   1    2.90    1.30
   1   7   2    4.90    2.00
   2   1   7    4.00    1.60
  -2   7   1    5.40    1.70
  -2  -7  -1   -1.10    2.20
  -2  -1  -7    0.70    1.90
  -1  -7  -2    3.10    2.00
  -2  -7   1    1.70    1.80
  -1   7   2    2.30    1.80
   1  -7   2    0.50    1.70
   1   2   7    3.20    1.70
   2  -7  -1    4.70    1.60
  -2   1   7    2.10    1.70
   3   0   7   12.10    1.90
   0   7   3    4.30    2.10
   0  -7   3    8.60    2.00
  -3   7   0    7.10    1.80
   0  -3  -7    6.20    2.40
   0   3   7    9.70    2.20
   3  -7   0    7.10    1.60
  -3  -7   0    8.30    2.30
   0  -7  -3    6.20    1.80
   2  -3   7   36.80    2.90
  -2   3   7   28.70    3.50
   3  -7   2   25.30    2.50
   2  -7  -3   26.30    3.10
  -7  -2  -3   24.00    3.00
   3  -7  -2   35.90    3.60
   3  -2   7   25.80    2.80
  -3   2   7   27.70    3.40
  -2   7   3   31.50    3.60
   1  -7  -4  103.69    7.80
  -7  -1  -4  114.69    7.50
  -1   4   7  116.39    8.10
  -4   7   1  134.09    7.90
  -1  -4  -7  118.19    8.20
   1   7   4  105.79    8.10
  -4  -7  -1  113.99    8.10
  -7   4   1  125.49    8.00
  -4  -1  -7  110.09    7.80
   1   4   7   98.49    8.10
   4  -7  -1   99.09    8.90
   4  -1   7  110.99    7.20
  -1   7   4  113.79    8.10
  -4   1   7  110.59    8.00
  -1  -7  -4  113.39    7.80
  -4  -7   1  125.19    8.40
   3   7   4  136.49    9.20
  -4   7   3  128.99    9.00
  -7   3   4  112.99    8.90
   4   3   7  129.79    8.60
  -3   4   7  137.19    9.20
   3  -7  -4  113.69    8.90
  -7   4   3  122.99    9.00
  -3   7   4  123.79    9.10
   3   4   7  134.79    8.80
  -3  -7  -4  155.08    9.20
   4  -7  -3  114.79    8.60
  -4  -3  -7  145.99    9.00
   0  -7  -5   37.40    4.30
  -5   0  -7   24.50    3.10
  -5  -7   0   23.50    3.60
   0   7   5   32.20    3.90
   5   0   7   26.90    3.30
  -2   5   7   97.29    7.50
  -2  -5  -7  106.29    7.40
   2  -7  -5   89.69    7.20
  -7  -2  -5   82.29    6.70
  -5  -7  -2   98.09    7.50
   5   2   7   81.29    7.90
   2   7   5   96.09    7.50
  -5   2   7   96.59    7.30
  -5  -2  -7   95.59    7.00
  -2  -7  -5   90.09    7.10
  -2   7   5   83.79    7.30
  -7   5   2   96.39    7.40
   2   5   7  106.19    7.40
  -4  -5  -7  106.29    8.30
  -7  -4  -5  106.09    8.00
   5   4   7  112.69    8.00
  -7   4   5  104.69    8.40
  -4   5   7  102.09    8.30
  -4  -7  -5  111.59    8.20
   4   5   7  115.69    8.40
  -5  -4  -7   96.69    8.00
  -5   4   7  114.49    8.20
  -7  -5  -4  101.89    8.20
  -4   7   5  108.19    8.70
  -1  -6  -7   89.19    7.00
   1  -7  -6   79.99    7.80
   1   7   6   82.09    6.90
  -7  -1  -6   84.79    6.20
  -6  -7  -1   79.99    7.20
  -1   6   7   79.29    7.40
  -7   6   1   83.69    6.70
   1  -6  -7   95.69    7.70
  -1  -7  -6   81.99    6.90
   1   6   7   86.59    7.10
  -1   7   6   86.59    7.30
  -7  -6  -1   81.19    7.10
  -6   7   3   71.89    6.90
  -7  -3  -6   64.29    6.00
  -3   6   7   72.49    6.70
  -6  -7  -3   75.19    7.00
  -7   3   6   66.49    6.60
  -3  -6  -7   73.49    6.70
  -3   7   6   69.49    7.10
  -6  -3  -7   70.79    6.20
  -6   3   7   71.29    6.50
   3   6   7   70.59    6.50
  -7   6   3   69.99    6.90
  -7  -6  -3   69.19    6.60
  -5   6   7   46.00    5.10
  -7   5   6   51.89    5.60
  -5  -6  -7   39.20    4.60
  -6   7   5   39.30    5.10
  -6   5   7   36.70    4.90
  -5  -7  -6   32.60    4.60
   5   6   7   38.60    4.70
  -7   6   5   50.29    5.50
  -7  -6  -5   37.00    4.60
  -7  -7   0   12.80    3.60
  -7   0  -7   17.00    2.80
   0   7   7   22.80    3.80
  -7  -7  -2   88.29    7.60
  -7  -2  -7   87.29    7.10
  -7   2   7   95.29    7.90
  -7   7   2   90.69    7.90
  -2  -7  -7   78.19    7.60
  -2   7   7  102.19    8.20
   2  -7  -7   94.39    7.80
   2   7   7   78.19    7.30
  -7  -4  -7   33.70    4.30
  -7   4   7   39.20    4.90
  -7   7   4   34.40    5.00
  -4  -7  -7   45.20    5.30
  -4   7   7   42.40    5.30
   4   7   7   44.40    5.00
  -7  -7  -6   17.20    4.10
  -7  -6  -7   17.50    3.90
  -7   6   7   16.60    4.20
  -7   7   6   25.40    4.70
  -6  -7  -7   18.10    3.90
  -6   7   7   23.80    4.30
   0  -8   0 3184.18  172.28
   0   0   8 3002.30  171.58
   1   1   8  122.59    8.00
  -1   8   1  118.59    8.10
   1  -8  -1  113.79    9.80
   1  -8   1  123.89    8.00
   1  -1   8  125.59    7.80
  -1  -1   8  117.59    8.00
  -1   1   8  116.79    8.00
  -1  -8  -1  106.89    8.10
  -2  -8   0   59.49    5.10
   0  -2   8   58.19    4.70
   0   2   8   55.39    5.00
   2  -8   0   48.80    4.30
   0  -8  -2   49.10    5.50
   2   0   8   50.79    4.50
   0  -8   2   52.69    4.60
   0   8   2   52.29    5.10
  -2   8   2    1.70    2.10
   2  -8  -2    1.30    1.70
   2  -8   2    3.80    1.60
  -2  -8  -2    0.60    1.90
  -2  -8   2    1.40    2.00
   2  -2   8    0.30    1.40
   1  -8  -3  346.57   20.80
  -1   3   8  350.46   20.90
   1  -3   8  362.46   20.50
  -8  -1  -3  357.56   20.50
   1   8   3  339.97   21.00
   3  -8   1  357.26   20.20
  -1  -3  -8  375.46   21.40
  -3  -8  -1  336.57   21.00
  -3   8   1  348.57   20.60
  -1  -8   3  324.97   20.60
  -1   8   3  344.97   21.00
  -1  -8  -3  360.16   20.80
   1  -8   3  351.66   20.30
   3  -1   8  364.16   20.40
  -3   1   8  388.16   21.00
   1   3   8  346.37   21.60
   3  -3   8  192.58   11.60
   3   3   8  204.88   12.60
  -8  -3  -3  203.08   12.40
  -3  -8  -3  196.78   12.70
  -3  -3  -8  193.88   12.80
  -3   3   8  198.88   12.70
  -3   8   3  194.58   12.80
   3  -8  -3  201.78   12.50
  -4   8   0  529.35   29.40
  -8   0  -4  533.35   29.20
   0  -4  -8  526.35   30.30
  -8   4   0  505.15   29.70
  -4  -8   0  518.75   30.00
   0   8   4  503.15   30.00
   4   0   8  504.15   29.30
   0   4   8  533.75   30.00
   0  -8  -4  512.35   29.90
   4  -8   0  486.05   29.20
   2  -8  -4   44.00    5.10
   2   8   4   42.80    4.80
  -8  -2  -4   49.60    5.30
  -2  -4  -8   48.90    5.50
  -2   4   8   55.79    5.40
  -4  -8  -2   54.49    5.50
  -2  -8  -4   41.60    5.20
   4  -2   8   46.60    3.90
  -4   2   8   60.99    5.40
  -2   8   4   52.49    5.40
   2   4   8   56.99    5.50
   2  -8   4   52.49    4.30
  -8  -4  -2   47.20    5.40
  -8   4   2   56.99    5.70
  -4  -2  -8   61.19    5.40
  -4  -4  -8 1342.77   75.79
   4   4   8 1399.96   75.79
  -8  -4  -4 1355.16   75.79
  -8   4   4 1371.46   75.99
  -4   4   8 1342.57   75.89
  -4  -8  -4 1307.87   75.79
  -4   8   4 1309.17   75.89
   5   1   8  161.18    9.90
  -8  -1  -5  157.28   10.00
   1   8   5  165.68   10.90
  -1   5   8  162.58   10.90
   1  -8  -5  165.98   10.60
  -5  -8  -1  158.58   10.80
  -1  -5  -8  149.59   10.70
   1  -8   5  139.69    9.50
   1   5   8  170.98   10.80
  -1  -8  -5  159.88   11.40
  -5  -1  -8  149.59   10.40
   5  -1   8  148.69    9.50
  -1   8   5  158.38   10.90
  -8   5   1  172.08   10.70
  -8  -5  -1  152.38   10.90
  -5   1   8  146.59   10.60
   5   3   8   69.39    6.20
  -3  -5  -8   71.29    6.50
  -8  -3  -5   75.79    6.20
  -8   3   5   73.19    6.70
   3   8   5   74.79    6.90
  -3   5   8   65.19    6.50
  -5   8   3   72.69    6.80
  -5  -8  -3   69.09    7.00
  -5  -3  -8   70.59    6.50
  -3  -8  -5   73.59    6.70
  -8   5   3   73.69    6.70
  -5   3   8   74.59    6.70
   3   5   8   73.29    6.30
  -5  -5  -8   61.19    6.40
   5   5   8   48.40    5.80
  -8  -5  -5   38.00    4.70
  -5   8   5   41.40    5.70
  -5  -8  -5   40.70    5.10
  -5   5   8   45.20    5.90
   0   6   8    5.90    3.00
   6   0   8    7.10    2.10
   0  -6  -8    5.60    2.90
  -6   8   0    7.90    2.30
   0  -8  -6    5.30    2.70
   0   8   6    2.30    2.60
  -6   0  -8    7.00    2.70
  -8   0  -6    6.70    2.10
   6   2   8    3.70    1.90
  -6  -8  -2    0.10    3.00
  -6   8   2    7.90    3.00
  -2  -6  -8    7.00    2.90
  -8  -2  -6    2.00    2.40
  -2   6   8    3.50    3.00
   2   8   6    5.50    3.00
   2  -8  -6    4.10    3.00
  -2   8   6    5.30    3.30
  -6   2   8    4.10    2.60
  -8   6   2    5.80    3.10
  -6  -2  -8    4.50    2.50
  -8  -6  -2    2.40    2.90
   2   6   8    7.00    2.90
  -2  -8  -6    2.80    3.40
  -4  -6  -8    8.30    3.30
  -4   6   8    4.70    3.10
   4   8   6    3.40    3.10
   6   4   8   -0.50    2.60
  -8   4   6    1.40    2.90
  -6  -8  -4    3.20    3.10
  -8  -4  -6    0.20    2.70
  -8   6   4    6.60    3.40
  -6  -4  -8    3.70    6.00
   4   6   8    1.90    3.00
  -6   4   8   10.10    3.00
  -8  -6  -4    6.70    3.40
  -4   8   6    3.80    3.30
  -4  -8  -6    4.60    3.10
  -6   8   6   -1.40    3.40
  -8  -6  -6   -1.80    3.00
  -8   6   6   -2.20    3.10
  -6  -6  -8   10.10    3.70
  -6   6   8    1.00    2.90
  -7   8   1  109.79    8.30
  -1   7   8  100.39    8.90
   1   8   7  130.59    9.10
  -7  -8  -1   98.09    9.40
  -8  -1  -7  108.49    8.10
  -7  -1  -8   95.79    8.00
   1  -7  -8   99.39    9.10
  -8  -7  -1   86.79    8.70
  -7  -8   1  104.49    9.20
  -1   8   7  118.69    9.30
  -1  -8  -7  120.49    8.90
  -8   7   1  129.99    8.70
   1   7   8  101.19    8.80
   3   8   7  168.88   11.30
  -3  -7  -8  149.39   11.10
  -3   7   8  171.18   11.40
  -7   8   3  138.59   11.50
  -8   3   7  142.19   11.00
  -7  -8  -3  143.49   11.20
  -8  -3  -7  151.58   10.30
  -8  -7  -3  146.39   11.10
  -3   8   7  141.89   11.20
  -3  -8  -7  147.39   12.30
   3   7   8  155.48   11.10
  -7   3   8  158.38   11.10
  -7  -3  -8  154.58   10.70
  -8   7   3  120.19   11.00
  -7  -8  -5  105.79    8.80
  -5   7   8   87.99    8.60
  -8  -5  -7   82.89    8.10
  -8   5   7   88.89    8.20
  -7   8   5  117.19    9.70
  -8  -7  -5   81.79    8.30
  -8   7   5   90.99    9.00
  -7  -5  -8   89.29    8.60
  -7   5   8   91.79    8.20
  -5  -8  -7   90.19    8.70
  -5   8   7   88.69    8.90
   5   7   8   87.09    8.30
  -8  -7  -7   36.90    5.30
  -8   7   7   46.20    6.00
  -7  -8  -7   29.40    5.10
  -7   7   8   33.40    5.40
  -7   8   7   32.70    5.60
  -8  -8   0  694.93   38.10
   0  -8  -8  621.94   38.10
   0   8   8  639.84   38.10
  -8  -8  -2   15.60    4.20
  -8  -2  -8   21.20    3.90
  -8   2   8   19.80    4.10
  -2  -8  -8   17.50    4.00
  -2   8   8   21.10    4.80
   2  -8  -8   17.90    4.10
   2   8   8   23.80    4.30
  -8  -8  -4  130.39   10.50
  -8  -4  -8  129.89   10.30
  -8   4   8  132.59   10.60
  -8   8   4  117.19   11.40
  -4  -8  -8  145.29   11.50
  -4   8   8  143.89   11.20
   4   8   8  128.59   10.40
  -8  -8  -6   25.30    4.70
  -8  -6  -8   11.50    4.00
  -8   6   8   11.60    4.20
  -8   8   6   21.60    5.00
  -6  -8  -8   12.60    4.70
  -6   8   8   10.40    4.50
   0  -1   9   23.70    3.10
   0   1   9   27.20    3.50
   0  -9   1   29.00    3.30
   1   0   9   24.50    3.10
  -1   0   9   22.40    3.20
  -2   9   1   56.19    5.40
  -1   2   9   55.99    5.60
  -2  -1   9   57.79    5.20
   2   1   9   52.89    4.90
  -2  -9  -1   56.19    5.70
  -1  -9   2   56.69    5.10
   1  -9  -2   42.70    4.80
  -1   9   2   52.49    5.60
  -2   1   9   52.29    5.10
   1   2   9   52.59    5.20
  -2  -9   1   47.70    5.20
  -1  -2   9   44.40    4.80
  -3  -9   0    7.70    2.80
   0  -3   9    4.60    2.10
   0   3   9    4.30    2.60
  -9   0  -3    3.90    2.10
  -3   0   9    5.10    2.50
  -9  -2  -3  153.78    9.70
  -3   9   2  146.59   10.00
  -2  -3  -9  147.89   10.60
  -2   3   9  162.48   10.40
  -2  -9   3  133.49    9.90
   2  -9  -3  165.58    9.90
   2  -3   9  141.89    9.20
  -3  -9  -2  143.39   10.30
   3   2   9  136.89    9.90
   2   3   9  135.89   10.10
  -2  -9  -3  141.49   10.10
  -3   2   9  149.59   10.00
  -2   9   3  156.58   12.90
  -3  -2  -9  141.09   10.40
  -3  -9   2  137.79   10.00
  -9  -3  -2  143.79    9.90
   3  -2   9  145.29    9.10
   1  -9  -4   27.00    3.60
   1   9   4   27.90    4.00
   1  -4   9   32.90    3.70
  -4   9   1   28.00    3.60
  -9  -1  -4   30.40    3.70
  -4  -9  -1   29.80    4.70
  -1   4   9   25.40    3.90
  -1  -4  -9   27.20    4.20
  -4   1   9   26.20    3.80
  -4  -9   1   23.90    3.90
   1  -9   4   36.60    3.00
  -1  -9  -4   24.00    3.60
  -9   4   1   29.00    4.10
   4  -1   9   28.40    3.20
   1   4   9   37.10    4.30
  -3  -4  -9   19.60    3.80
  -9  -3  -4   25.60    4.10
   3  -9  -4   24.00    3.50
  -4  -9  -3   21.60    4.00
   3  -4   9   20.20    2.40
  -4   9   3   22.30    3.80
  -3   4   9   22.80    3.70
   4   3   9   23.20    3.20
  -3  -9  -4   22.70    3.70
  -3   9   4   21.00    4.10
  -4   3   9   21.40    3.60
  -9   4   3   18.80    3.70
  -4  -3  -9   22.10    6.20
  -4  -9   3   19.50    3.90
   3   4   9   31.30    6.50
   0   5   9   20.00    4.10
   0   9   5   11.90    3.30
  -5  -9   0   15.60    3.50
  -5   9   0   18.20    2.80
   5   0   9   11.50    2.30
   0  -9  -5   15.00    3.10
  -9   0  -5   16.00    2.70
  -5   0   9   16.10    3.50
  -9  -2  -5   51.79    5.40
   2  -5   9   44.80    4.10
  -5   9   2   59.19    5.80
   5   2   9   44.30    5.20
   2  -9  -5   50.59    5.80
  -5  -2  -9   37.30    4.90
  -5   2   9   53.39    6.00
  -2   9   5   42.80    5.30
  -9  -5  -2   36.70    4.90
  -5  -9   2   55.49    6.10
  -9   5   2   42.00    5.20
  -5  -9  -4   69.09    7.70
   5   4   9   77.19    7.10
  -9   4   5   74.59    7.40
  -4   5   9   74.19    8.10
  -4  -5  -9   91.29    7.40
  -9  -4  -5   80.39    7.00
  -5   9   4   71.99    7.60
  -5  -4  -9   76.19    7.10
  -9   5   4   64.09    7.60
  -4  -9  -5   79.59    7.40
  -9  -5  -4   74.69    7.50
  -9  -1  -6  159.58   10.00
  -6   9   1  151.88   10.20
  -1  -6  -9  143.09   11.40
  -1   6   9  139.09   11.10
   6   1   9  149.69    9.70
   1   9   6  147.89   11.10
  -6  -9  -1  148.39   10.90
   1  -9  -6  145.89   10.70
   1   6   9  146.59   10.70
  -9  -6  -1  166.38   11.00
  -1   9   6  138.99   10.80
  -9   6   1  144.29   10.70
   1  -9   6  140.99    9.50
  -1  -9  -6  142.39   10.60
  -6  -9   1  155.38   10.80
  -6   1   9  152.48   10.90
  -6  -1  -9  137.69   10.70
  -9   3   6   38.20    5.10
  -3  -6  -9   48.30    5.40
   3  -9  -6   56.19    6.30
  -6  -9  -3   37.30    5.40
  -9  -3  -6   43.10    4.80
   3   9   6   42.10    5.20
  -6   9   3   36.30    5.10
   3   6   9   39.30    4.90
  -9   6   3   59.19    6.20
  -3   9   6   36.50    5.50
  -3  -9  -6   46.60    5.30
  -9  -6  -3   43.60    5.50
  -6   3   9   48.40    5.70
  -6  -9  -5   13.00    4.20
  -9  -5  -6   30.40    4.30
   6   5   9   15.40    3.70
  -5  -6  -9   12.50    4.00
  -5   6   9   22.00    4.20
  -9   5   6   19.90    4.20
  -6   9   5   12.60    4.40
  -9  -6  -5   26.30    4.30
  -5   9   6   15.80    4.50
  -6   5   9   15.00    4.00
  -9   6   5   17.60    4.40
  -5  -9  -6   21.20    4.30
   5   6   9   21.60    4.00
  -6  -5  -9   18.10    4.00
  -9   0  -7   64.29    6.40
   0  -9  -7   71.39    7.50
   0   9   7   84.09    7.70
  -9  -7   0   99.49    8.10
   0  -7  -9   86.79    8.60
   0   7   9   72.89    7.60
  -7  -9   0   76.19    7.80
   2  -7   9   80.49    5.50
  -7  -9  -2   72.79    8.10
  -7   9   2   71.39    7.50
  -2   7   9   80.69    8.00
   2  -9  -7   73.79    7.70
   2   9   7   80.39    8.10
  -2  -9  -7   69.89    7.60
  -7   2   9   70.59    7.60
  -9   7   2   72.99    8.00
   2   7   9   77.99    7.30
  -7  -9   2   63.99    7.90
  -7  -2  -9   73.59    6.90
  -2   9   7   87.09    8.10
  -9  -7  -2   69.49    8.00
  -4  -7  -9   28.90    4.80
  -9  -4  -7   31.80    4.50
  -4   7   9   30.70    4.80
   4   9   7   22.70    4.60
  -7  -9  -4   24.50    4.60
  -7   9   4   28.50    5.30
  -9   4   7   31.60    5.10
  -4  -9  -7   31.60    5.20
  -7   4   9   37.10    4.80
  -4   9   7   27.70    5.10
  -9   7   4   26.90    5.30
   4   7   9   25.70    4.70
  -7  -4  -9   29.50    4.70
  -9  -7  -4   26.50    4.90
  -9   6   7   96.09   10.00
  -7   9   6  128.49   15.40
  -6  -7  -9   95.59    9.90
  -9  -6  -7  103.59    9.60
  -7  -9  -6  114.09    9.70
  -6   7   9   93.69    9.50
  -6  -9  -7  110.79    9.70
  -9  -7  -6  114.29    9.90
  -7  -6  -9  111.79    9.90
  -7   6   9  104.59    9.80
   1   9   8   12.00    3.80
  -8  -9  -1   10.90    3.90
  -1   8   9   13.00    3.70
   1  -9  -8   16.00    4.20
  -8   9   1    9.00    3.00
  -9  -1  -8   13.70    3.30
  -1  -8  -9    7.50    3.60
  -9  -8   1   14.80    4.20
  -9  -8  -1    9.30    3.80
  -8  -9   1    7.60    3.90
  -9   8   1    9.40    3.00
  -8  -1  -9    9.50    3.30
  -8   1   9    3.90    3.50
  -1  -9  -8    7.40    3.40
   1   8   9   12.50    3.50
   1  -8  -9    8.70    4.10
  -1   9   8    8.20    3.60
  -9   3   8   42.00    5.90
  -8  -9  -3   39.70    5.80
   3   9   8   38.90    6.50
  -9  -3  -8   43.40    5.30
  -3   8   9   36.20    5.60
  -3  -8  -9   35.10    5.20
  -8   9   3   34.60    5.50
  -8   3   9   48.50    6.00
  -3  -9  -8   51.19    5.90
  -9   8   3   40.10    6.10
  -8  -3  -9   35.00    5.20
  -9  -8  -3   47.10    6.30
   3   8   9   42.10    5.80
  -3   9   8   42.40    6.00
  -5   8   9   47.00    6.60
  -8   9   5   49.60    7.80
  -5  -8  -9   45.50    6.20
  -9  -5  -8   43.50    9.10
  -9   5   8   38.40    5.80
  -8  -9  -5   39.60    5.80
  -9   8   5   41.00    7.00
  -8  -5  -9   51.29    6.40
  -8   5   9   49.90    6.30
  -5  -9  -8   49.30    6.70
  -5   9   8   42.90    6.40
   5   8   9   45.00    5.80
  -9  -8  -5   42.60    6.00
  -9  -9   0  100.89   10.10
  -9   0  -9  132.29    9.10
   0  -9  -9  109.59   10.10
   0   9   9  111.09    9.70
  -9  -9  -2    1.90    3.80
  -9  -9   2    7.80    4.00
  -9  -2  -9    3.10    2.80
  -9   2   9   -2.20    3.30
  -9   9   2   -0.40    2.90
  -2  -9  -9    0.40    3.50
  -2   9   9   -3.80    3.50
   2   9   9    1.90    3.70
  -9  -4  -9   21.40    4.50
  -9   4   9   30.50    4.90
  -9   9   4   19.30    5.50
  -4  -9  -9   11.40    4.50
  -4   9   9   19.50    5.00
   0 -10   0   42.30    5.10
   1 -10  -1  128.69    8.80
   1  -1  10  127.09    8.90
   1   1  10  145.49    9.20
  -1 -10  -1  128.39    9.30
  -1  -1  10  124.99    9.00
  -1   1  10  124.39    9.30
   0  -2  10   46.50    5.00
   0   2  10   50.89    5.20
  -2   0  10   67.39    5.70
   0 -10  -2   47.40    5.30
   2   0  10   53.79    5.20
 -10  -2  -2  548.55   29.80
   2   2  10  495.85   29.90
  -2  -2  10  476.55   29.80
  -2   2  10  530.95   30.10
  -2  10   2  519.55   30.00
   2 -10  -2  475.15   29.70
   2  -2  10  542.25   29.50
  -2 -10  -2  536.45   30.10
  -2 -10   2  498.75   29.90
  -3 -10  -1  278.17   18.70
 -10  -1  -3  302.57   18.20
  -1   3  10  312.67   18.70
   1  -3  10  303.17   18.00
   3   1  10  305.37   18.40
   1 -10  -3  294.47   18.50
   3  -1  10  310.07   18.10
   1   3  10  336.07   18.80
  -1  -3  10  287.47   18.30
 -10   1  -3  305.87   18.50
  -1 -10  -3  296.67   18.60
  -3   1  10  326.57   18.80
  -1  10   3  309.17   19.00
   3   3  10   79.89    6.70
 -10  -3  -3   66.99    6.90
  -3  10   3   70.99    7.00
   3 -10  -3   83.59    6.70
   3  -3  10   73.29    5.60
  -3 -10   3   77.19    7.10
  -3 -10  -3   72.79    7.30
  -3   3  10   70.29    7.00
  -4   0  10    3.90    2.70
   0  10   4    4.80    3.20
   4   0  10    5.10    2.20
  -4 -10   0    0.70    3.00
   4 -10   0    3.50    1.90
   0   4  10    2.70    2.90
 -10   0  -4    4.40    2.70
 -10   4   0    7.10    3.10
   0 -10  -4    3.40    2.80
  -4  10   2   29.70    4.40
   2  -4  10   40.70    4.80
  -2   4  10   39.90    4.80
   4   2  10   41.70    4.40
  -4 -10  -2   45.50    5.60
  -2 -10   4   44.80    4.70
   2 -10  -4   37.40    4.60
 -10  -2  -4   36.90    4.50
  -4 -10   2   32.60    4.60
 -10   4   2   39.50    5.00
  -2 -10  -4   38.90    4.80
   2 -10   4   35.00    3.70
 -10  -4  -2   39.00    4.80
   4  -2  10   35.20    4.00
  -4   2  10   41.90    4.80
  -2  10   4   33.40    4.80
   2   4  10   49.50    5.40
  -4  10   4    7.40    3.40
  -4 -10  -4   12.50    3.90
   4 -10  -4    7.00    4.70
   4   4  10    6.70    2.80
  -4   4  10   10.70    3.60
  -4  -4 -10    7.10    3.50
 -10  -4  -4    4.30    3.60
 -10   4   4    8.40    3.40
  -4 -10   4   19.00    4.00
   1  10   5  309.57   19.10
   1  -5  10  306.87   17.80
 -10  -1  -5  296.17   18.00
  -5 -10  -1  303.07   19.10
  -1 -10   5  307.67   19.00
  -5  10   1  290.37   18.30
   1 -10  -5  277.27   18.50
  -1   5  10  299.87   18.90
   5   1  10  315.77   17.90
  -5   1  10  275.97   18.60
  -1  10   5  299.57   19.00
   1 -10   5  311.57   17.70
   5  -1  10  326.27   17.60
   1   5  10  295.07   18.80
  -1 -10  -5  298.27   18.80
  -5 -10   1  288.07   18.70
 -10  -5  -1  295.17   18.80
 -10   5   1  284.07   18.80
  -3   5  10   67.49    6.90
   3 -10  -5   63.89    7.30
 -10   3   5   61.39    6.70
  -3  -5 -10   65.99    7.70
  -5  10   3   69.29    7.20
  -3 -10   5   68.39   10.30
  -5   3  10   63.99    7.30
  -5  -3 -10   84.79    7.80
  -3 -10  -5   69.89    7.00
  -5 -10   3   58.59    6.40
 -10  -5  -3   60.39    7.10
   3   5  10   55.09    6.20
  -3  10   5   63.29    7.50
 -10   5   3   84.29    8.20
  -5  -5 -10   57.79    6.90
  -5   5  10   60.09    7.10
 -10  -5  -5   70.99    7.10
  -5 -10  -5   61.09    6.70
   5   5  10   80.59    8.50
  -5  10   5   64.39    7.20
 -10   5   5   62.29    7.00
 -10  -6   0   71.19    8.00
   0 -10  -6   84.29    7.30
  -6   0  10   63.79    7.30
   0   6  10   64.29    7.60
   0 -10   6   69.19    7.20
   0  10   6   73.29    7.70
 -10   0  -6   67.49    6.30
  -6 -10   0   79.39    7.80
   6   2  10  243.28   14.20
  -2   6  10  229.98   16.20
 -10  -2  -6  220.18   14.40
   2  -6  10  227.78   13.60
   2  10   6  233.38   15.30
  -6  10   2  231.58   15.00
  -2  -6 -10  223.18   15.60
  -6 -10  -2  206.58   15.40
   2 -10  -6  259.87   15.40
  -6 -10   2  221.28   15.20
 -10   6   2  199.68   15.40
   2   6  10  236.08   15.10
  -2  10   6  228.18   15.50
  -6  -2 -10  215.58   15.10
 -10  -6  -2  241.88   15.30
  -2 -10  -6  224.38   15.30
  -6   2  10  220.08   15.20
  -4   6  10   11.00    3.60
  -6 -10  -4    4.10    3.90
 -10   4   6    3.10    3.50
 -10  -4  -6    5.70    3.50
  -4  -6 -10    5.60    3.20
  -6  10   4   -1.10    3.80
   6   4  10    1.90    2.80
  -4 -10  -6   10.00    3.80
   4   6  10    6.90    3.40
  -4  10   6   -0.40    3.70
  -6   4  10    7.70    3.30
 -10  -6  -4    4.60    3.60
 -10   6   4    4.50    3.90
  -6  -4 -10    7.00    3.20
  -6 -10  -6  195.28   13.60
  -6  10   6  168.68   14.60
   6   6  10  159.88   12.70
 -10   6   6  211.68   14.30
  -6   6  10  189.38   13.40
  -6  -6 -10  167.58   12.90
 -10  -6  -6  188.78   13.10
   1  10   7   35.60    5.30
  -1  -7 -10   34.00    5.40
  -1   7  10   38.50    5.50
   1 -10  -7   34.00    5.20
   1  -7  10   39.00    4.10
  -7 -10  -1   53.09    6.10
 -10  -1  -7   35.80    4.60
  -7  10   1   31.60    4.30
 -10   7   1   33.90    4.50
 -10  -7  -1   30.50    5.10
  -7   1  10   40.70    5.50
  -1  10   7   35.30    5.30
  -7 -10   1   31.10    5.20
  -1 -10  -7   39.90    5.40
   1   7  10   35.10    5.40
   3  10   7   59.09    6.80
 -10  -3  -7   68.79    7.20
 -10   3   7   67.99    7.60
  -3  -7 -10   54.09    8.60
  -7 -10  -3   70.79    8.20
  -3  10   7   67.89    7.80
 -10  -7  -3   64.59    7.00
   3   7  10   51.29    6.30
  -3 -10  -7   69.89    7.20
  -7   3  10   59.89    6.60
  -7  -3 -10   56.39    6.80
  -7 -10   3   64.99    8.40
  -5   7  10  108.49   10.20
  -7 -10  -5  128.39   10.60
 -10  -5  -7   92.49   11.20
 -10   5   7  120.69   11.70
  -5  -7 -10  116.99    9.80
  -7  10   5   98.79   10.70
   5   7  10  120.39    9.80
  -7   5  10  124.79   10.40
  -5 -10  -7  138.19   10.70
 -10   7   5  122.39   11.30
 -10  -7  -5  100.39    9.90
  -7  -5 -10  109.09    9.40
   0 -10  -8    2.80    5.80
   0  -8 -10    5.90    4.00
  -8 -10   0   10.50    3.90
  -8   0  10    2.50    3.60
   0   8  10    0.20    3.20
 -10  -8   0   -1.20    3.60
   0  10   8   -1.20    3.70
   2 -10  -8    3.20    3.40
  -8  10   2   -0.50    4.90
  -2  -8 -10   -1.00    3.30
 -10  -2  -8   -2.80    3.20
  -2   8  10    2.80    3.80
   2  10   8   -2.60    3.20
 -10   2   8   -0.30    3.30
  -8 -10  -2   -0.20    4.30
  -8 -10   2   -2.70    3.70
  -8   2  10    1.80    3.70
  -2 -10  -8   -3.20    3.00
  -8  -2 -10   -3.80    3.00
  -2  10   8   -6.80    3.30
   2   8  10   -2.90    3.20
 -10  -8  -2   -1.40    4.40
 -10   8   2   -0.90    3.30
  -8 -10  -4    2.80    4.00
  -4   8  10    3.00    4.40
  -8  10   4    3.20    3.90
  -4  -8 -10    6.20    3.50
 -10  -4  -8    0.10    3.20
 -10   4   8    4.70    4.30
  -4 -10  -8    2.90    4.10
  -4  10   8    3.30    6.70
  -8   4  10   -0.30    3.50
 -10  -8  -4    2.80    3.80
 -10   8   4    1.90    4.30
  -8  -4 -10    5.20    3.40
   1 -10  -9   35.90    5.40
 -10  -1  -9   23.50    4.10
  -9 -10  -1   33.50    5.70
  -1  -9 -10   35.00    5.80
   1  10   9   44.30    5.90
  -1   9  10   23.50    5.00
 -10   1   9   47.10    6.40
 -10  -9   1   37.70    5.90
  -9  -1 -10   25.60    4.60
   1   9  10   21.80    4.80
 -10  -9  -1   42.70    5.60
  -9   1  10   29.00    5.60
  -1 -10  -9   37.70    6.90
  -9 -10   1   30.00    5.50
  -1  10   9   29.60    5.30
  -1 -11   0   12.90    3.00
   0  -1  11    7.40    2.50
  -1   0  11    3.80    2.60
   0 -11  -1   10.70    2.80
   0 -11   1   11.30    3.00
   1   0  11    4.80    2.40
  -1   2  11   17.00    3.30
  -1 -11   2   12.60    3.60
   1  -2  11   12.20    3.20
  -2 -11  -1   16.60    3.40
   2 -11   1   18.10    2.70
   2   1  11   18.80    3.40
 -11  -1  -2   15.10    3.50
  -2  -1  11   17.30    3.30
   1 -11  -2   17.30    3.30
   2 -11  -1   11.20    2.90
  -1 -11  -2   17.50    3.40
   1 -11   2   26.00    3.20
  -2 -11   1   20.90    4.20
  -1  -2  11   13.90    3.20
 -11   0  -3   14.20    3.00
  -3   0  11   12.80    3.40
  -3 -11   0   16.20    4.10
   0 -11  -3   10.70    3.20
   0  -3  11   12.00    2.70
   0   3  11   13.80    3.40
   3 -11   0   10.80    2.40
  -3  -2  11   24.20    4.00
   2  -3  11   18.90    2.90
   3   2  11   23.40    3.90
  -3 -11  -2   34.70    4.70
  -2   3  11   26.20    3.80
 -11  -2  -3   23.40    3.80
  -3  11   2   24.60    4.20
   3 -11   2   20.70    2.70
   2   3  11   25.50    4.60
  -3   2  11   17.90    3.60
   3  -2  11   25.90    3.20
 -11  -3  -2   16.70    4.00
   3 -11  -2   15.30    4.90
   2 -11   3   21.40    3.20
  -3 -11   2   21.50    4.20
  -2 -11  -3   16.60    3.70
  -2  11   3   16.10    3.90
  -2  -3  11   22.70    3.70
  -4  -1  11   45.60    5.80
   1  -4  11   61.59    5.30
  -1   4  11   74.79    6.80
  -1 -11   4   52.09    6.00
   1 -11  -4   50.09    7.70
 -11  -1  -4   57.89    6.30
  -4 -11  -1   54.89    6.10
 -11   4   1   66.59    7.00
  -1  11   4   44.40    5.90
   1 -11   4   46.30    5.20
   4  -1  11   57.19    5.70
 -11  -4  -1   54.89    6.10
  -4 -11   1   60.19    6.10
  -4   1  11   49.20    5.80
  -1  -4  11   62.29    5.80
   1   4  11   57.39    6.90
   4 -11  -1   57.09    5.00
   4   3  11   20.40    3.60
 -11  -3  -4    7.90    3.80
  -4  11   3   16.50    4.00
  -4 -11  -3   10.50    4.00
  -3   4  11   15.50    3.60
   3  -4  11   16.80    2.50
   3 -11  -4   18.40    3.50
  -3 -11   4   25.10    4.20
  -3 -11  -4   12.20    3.80
   4 -11  -3   19.30    3.30
  -4   3  11   19.90    4.00
 -11  -4  -3   12.50    3.80
  -4 -11   3   19.00    4.20
  -3  11   4   12.90    3.90
   3   4  11   16.30    3.70
 -11   4   3   14.20    3.80
   4  -3  11   16.80    2.60
   0  -5  11   93.59    6.80
   0  11   5   89.79    8.70
   5   0  11   75.99    7.00
  -5 -11   0   87.09    8.50
 -11   0  -5   85.19    7.20
   0 -11   5   90.99    7.00
  -5   0  11   86.19    8.20
   2 -11  -5   44.80    5.40
  -5 -11  -2   45.80    5.70
 -11  -2  -5   36.50    4.70
  -2 -11   5   52.59    6.00
   2  -5  11   45.90    4.30
  -2   5  11   43.60    5.40
  -5  11   2   44.20    5.30
   5  -2  11   54.99    4.30
  -2 -11  -5   38.60    5.40
  -2  11   5   34.30    5.70
 -11  -5  -2   40.60    5.50
   2   5  11   45.30    5.50
  -5 -11   2   48.70    8.80
   2 -11   5   34.50    4.00
  -5   2  11   36.10    6.30
 -11   4   5   23.40    4.70
  -5 -11  -4   24.40    5.10
 -11  -4  -5   38.40    4.70
  -4  -5 -11   31.50    5.40
  -4   5  11   30.70    4.80
   5   4  11   32.00    4.70
  -4 -11   5   29.10    6.80
  -5  11   4   26.50    5.10
  -5 -11   4   36.40    5.00
  -4  11   5   25.70    5.20
 -11   5   4   32.00    5.80
  -5   4  11   31.50    5.10
  -4 -11  -5   42.50    5.50
  -5  -4 -11   27.40    5.10
   4   5  11   30.70    4.70
   1 -11  -6   11.00    3.90
  -1   6  11   18.00    4.40
   6   1  11    9.10    2.90
  -6 -11  -1   11.00    4.60
  -6  -1  11   12.20    3.80
  -6  11   1   26.00    4.10
   1  11   6   10.80    4.30
   1  -6  11   15.10    2.60
 -11  -6  -1   12.20    4.50
 -11   6   1    5.80    3.60
   6  -1  11   16.70    2.50
   1   6  11   15.70    3.80
  -1  11   6   12.80    4.30
  -6   1  11   16.30    3.80
   1 -11   6   21.70    3.30
  -3   6  11    1.00    3.20
  -6 -11  -3    3.10    3.90
 -11   3   6    3.60    3.30
  -3  -6 -11    0.40    3.60
 -11  -3  -6    4.40    3.30
   6   3  11    1.20    2.60
  -3  11   6    0.40    3.60
 -11  -6  -3    0.90    3.90
  -6   3  11   -1.50    3.00
  -3 -11  -6    6.10    4.10
  -6  -3 -11   -0.10    3.50
   3   6  11    5.80    3.40
  -6 -11   3    0.10    3.30
   6   5  11   50.49    6.00
  -5   6  11   54.79    6.40
 -11   5   6   52.09    6.70
  -6 -11  -5   64.39    7.30
  -6  11   5   58.89    7.20
 -11  -5  -6   52.59    6.70
  -6   5  11   64.99    7.60
  -5 -11  -6   49.60    6.60
  -6  -5 -11   48.50    6.30
 -11  -6  -5   66.79    7.70
  -5  11   6   54.99    7.30
   0 -11  -7   12.50    3.90
  -7 -11   0   11.80    7.80
  -7   0  11   15.50    4.50
 -11  -7   0   19.10    7.40
   0  -7  11   12.20    3.00
   0   7  11   12.50    4.10
   0  11   7   14.50    4.70
  -2  -7 -11   20.00    4.70
   2  11   7   22.10    4.70
  -7 -11  -2   16.20    4.70
  -7  11   2   20.90    4.10
   2   7  11   20.20    4.30
  -7 -11   2   33.70    4.90
  -2  11   7   20.70    5.00
  -7   2  11   17.10    4.50
  -2 -11  -7   19.60    4.80
 -11   7   2    4.90    4.70
 -11  -7  -2    9.40    4.40
  -4  -7 -11    4.90    4.30
  -7 -11  -4   -6.00    3.60
 -11  -4  -7    2.50    3.50
 -11   4   7   10.60    4.20
  -4   7  11    1.70    3.70
  -7  11   4    3.50    4.00
  -7  -4 -11    1.30    3.40
  -4  11   7    7.60    4.30
   4   7  11    4.80    3.90
 -11   7   4    2.20    4.20
  -7   4  11    1.20    3.40
 -11  -7  -4    0.50    3.50
  -8  11   1   51.79    5.90
  -1  -8 -11   42.70    6.60
  -1   8  11   46.20    6.00
   1  -8  11   44.50    4.60
   1  11   8   31.80    5.80
 -11  -1  -8   37.20    4.90
 -11  -8  -1   46.80    6.40
  -8   1  11   54.39    6.70
  -1 -11  -8   46.60    6.00
   1   8  11   44.40    5.90
  -1  11   8   46.10    6.50
   0 -12   0   97.29    7.40
   0   0  12   82.69    7.30
   1 -12  -1  201.38   13.40
   1 -12   1  224.78   13.20
   1  -1  12  203.58   13.30
   1   1  12  223.48   13.80
  -1 -12  -1  195.38   13.60
  -1 -12   1  224.88   13.70
  -1  -1  12  199.78   13.60
  -1   1  12  193.48   13.60
 -12   0  -2   10.20    3.20
   2 -12   0   10.40    2.70
   0  -2  12   15.90    3.10
   0   2  12   14.60    3.50
   0 -12  -2    7.20    3.10
   0 -12   2   13.30    2.90
   2   0  12   15.00    3.20
  -2 -12   0    9.70    3.50
  -2 -12  -2    2.90    3.00
  -2 -12   2    5.20    3.50
  -2  -2  12    5.40    3.00
 -12  -2  -2    5.90    3.50
 -12   2  -2    7.40    2.90
   2  -2  12    7.00    2.40
   2   2  12   13.00    3.50
  -2   2  12    4.50    2.80
   2 -12  -2    5.70    2.50
   2 -12   2    8.20    2.10
 -12  -1  -3   76.29    7.70
  -1   3  12   77.59    7.90
   1  -3  12   88.69    6.90
   3 -12   1   89.99    6.40
  -1 -12   3   88.59    7.70
   1 -12  -3  103.39    7.70
  -3  -1  12   84.89    7.90
   3   1  12   93.99    7.70
  -3 -12  -1   87.29    8.30
   3 -12  -1   84.69    6.70
  -1 -12  -3   90.09    7.90
  -1  -3  12   82.19    7.50
   1 -12   3   80.19    6.60
  -3 -12   1  100.39    8.40
   1   3  12   89.79    8.50
   3  -1  12   76.89    7.20
 -12   1  -3   93.69    7.30
  -3   1  12  104.19    8.10
 -12  -3  -1  102.59    9.10
  -3   3  12  181.18   12.60
  -3  12   3  191.98   13.30
  -3 -12  -3  179.98   12.80
 -12  -3  -3  179.58   12.70
  -3  -3  12  208.78   12.90
   3 -12   3  159.88   10.90
   3  -3  12  175.78   11.50
   3   3  12  191.08   12.60
 -12   0  -4  300.07   18.20
  -4 -12   0  309.97   19.10
   0   4  12  305.97   19.10
   4 -12   0  314.37   19.60
  -4   0  12  296.27   18.90
   0 -12  -4  295.77   18.90
   4   0  12  280.07   18.00
  -4  -2  12   18.10    3.80
   2  -4  12   10.10    2.40
  -2   4  12   10.60    3.60
  -4 -12  -2   15.40    4.20
 -12  -2  -4   10.50    3.60
   4   2  12    7.60    3.00
  -2 -12  -4    8.10    3.40
  -2  -4  12    8.50    3.20
  -2  12   4    7.50    4.00
   4  -2  12   14.40    2.70
   2   4  12    5.30    3.90
 -12   4   2    8.80    3.60
 -12  -4  -2   11.20    3.90
  -4 -12   2    6.30    3.50
  -4   2  12   10.20    3.50
  -4 -12  -4   80.49    8.10
   4   4  12   61.99   10.20
  -4  12   4   77.19    8.70
 -12  -4  -4   64.69    6.90
 -12   4   4   69.79    7.90
  -4   4  12   71.19    7.60
   5   1  12   41.40    4.40
  -5  -1  12   39.40    5.40
  -1   5  12   42.10    5.60
   1   5  12   39.30    5.70
 -12   5   1   40.80    5.90
  -5 -12   1   37.20    5.70
  -1  -5  12   34.60    4.60
  -1 -12  -5   35.00    5.10
 -12  -5  -1   32.90    5.60
  -1  12   5   33.30    5.60
  -3   5  12  108.79    9.60
   5   3  12  111.59    9.10
 -12  -3  -5  106.39    9.30
  -5  -3  12  110.39    9.90
  -5 -12  -3  139.49   10.20
  -5  12   3  114.59   10.30
   3  -5  12  116.29    7.70
 -12   3   5  111.69    9.80
  -3 -12  -5  135.99   10.00
  -5   3  12  108.89    9.80
 -12   5   3  111.59   10.40
   3   5  12  100.29    9.30
  -3  12   5   95.39   10.40
  -6 -12   0   -4.70    3.20
   0  -6  12    0.30    2.20
   6   0  12   -1.80    2.30
  -6   0  12   -2.30    3.10
   0  12   6   -2.30    3.70
 -12  -6   0    1.00    4.30
   0   6  12    1.50    3.80
 -12  -2  -6    2.40    3.30
  -6  12   2    7.90    3.60
  -2   6  12   14.90    4.10
   2  -6  12    7.20    2.10
  -6  -2  12    9.50    4.00
  -6 -12  -2   19.50    4.50
   6   2  12    8.80    2.90
 -12  -6  -2   13.80    4.40
 -12   6   2    7.00    3.80
  -6   2  12    6.10    3.50
  -2 -12  -6    4.50    3.70
  -2  -6  12    5.90    3.10
  -2  12   6    7.70    4.30
   2   6  12   10.50    3.60
   0  -1  13    3.40    2.80
   0   1  13    7.30    3.10
   1   0  13    3.70    3.00
  -1   0  13   -1.10    2.70
   1  -2  13   15.30    3.30
 -13  -1  -2   12.50    4.00
  -2  -1  13   20.80    3.80
   2   1  13   19.90    4.10
  -1   2  13   13.40    3.60
   1   2  13   17.40    4.00
  -1  -2  13   14.70    3.50
 -13  -2  -1    9.70    4.50
  -3   0  13   22.10    4.10
   0  -3  13   17.80    3.50
   0   3  13   20.10    4.30
  -2   3  13   30.80    4.50
   2  -3  13   29.10    4.10
  -3  -2  13   30.50    4.70
 -13  -2  -3   28.30    4.60
   3   2  13   25.80    4.20
  -3   2  13   25.20    4.40
   2   3  13   26.90    4.90
 -13  -3  -2   16.50    4.50
  -2  -3  13   34.90    8.00
   3  -2  13   20.50    6.80
   1  -4  13   -2.10    2.20
  -1   4  13    3.70    3.70
  -1  -4  13    0.70    2.60
 -13  -4  -1   -1.00    3.90
 -13   4   1    9.10    3.60
  -4   1  13    4.70    3.00
   1   4  13    1.40    3.80
   4  -1  13    6.10    2.70
   0   0   0    0.00    0.00

_computing_structure_solution     'SHELXT 2018/2 (Sheldrick, 2018)'
;
_shelx_hkl_checksum   32074
